# Supplementary material for: Diet quality and survival after ovarian cancer: results from an ovarian cancer follow-up study (OOPS)
Source: Royal Society of Chemistry journal article supplement (doi:10.1039/d3fo00979c), 2023-01-01
Supplement: d3fo00979c1.pdf [file d3fo00979c1.pdf]

**Supplementary Table 1. The definition and sectionalization of covariables within the Ovarian Cancer Follow-up Study**

| Covariables                          | Definition                                                                                                                                                           | Group                                                                                                        |
|--------------------------------------|----------------------------------------------------------------------------------------------------------------------------------------------------------------------|--------------------------------------------------------------------------------------------------------------|
| <b>Continuous variable</b>           |                                                                                                                                                                      |                                                                                                              |
| Age at diagnosis (years)             | Date of diagnosis - Date of birth                                                                                                                                    | ≤50, >50                                                                                                     |
| Body mass index (kg/m <sup>2</sup> ) | Weight (kg)/height (m <sup>2</sup> )                                                                                                                                 | <24, ≥24                                                                                                     |
| Total energy intake (kcal/d)         | Total daily energy from all food intake                                                                                                                              | -                                                                                                            |
| Physical activity (MET hours/day)    | The metabolic equivalent task of each activity is multiplied by the frequency and duration of physical activity to obtain the daily metabolic equivalent of exercise | -                                                                                                            |
| <b>Categorical variable</b>          |                                                                                                                                                                      |                                                                                                              |
| Menopausal status                    | -                                                                                                                                                                    | Yes, No                                                                                                      |
| Oral contraceptive use               | -                                                                                                                                                                    | Yes, No                                                                                                      |
| Parity                               | -                                                                                                                                                                    | ≤1, ≥2                                                                                                       |
| Diet change                          | Changes in diet from the year prior to diagnosis                                                                                                                     | Yes, No                                                                                                      |
| Alcohol intake                       | Alcohol intake at least once a week for 6 months or more                                                                                                             | Yes, No                                                                                                      |
| Tea drinking                         | Tea drinking at least once a week for 6 months or more                                                                                                               | Yes, No                                                                                                      |
| Smoking status                       | Smoking at least once a week for 6 months or more                                                                                                                    | Yes, No                                                                                                      |
| Educational level                    | -                                                                                                                                                                    | Junior secondary or below, Senior high school/technical secondary school, Junior college/university or above |
| Income per month (Yuan)              | -                                                                                                                                                                    | <5000, 5000-10000, >10000                                                                                    |
| Comorbidities                        | Any different extra clinical entity that has existed or may develop during the clinical course of a patient with ovarian cancer under study                          | Yes, No                                                                                                      |
| FIGO stage                           | International Federation of Gynecology and Obstetrics stage                                                                                                          | I-II, III-IV, unknown                                                                                        |

|                       |   |                                       |
|-----------------------|---|---------------------------------------|
| Histological type     | - | Serous, Non-serous                    |
| Histopathologic grade | - | Well, Moderate, Poorly differentiated |
| Residual lesions (cm) | - | None, <1, ≥1                          |

Abbreviation: MET, metabolic equivalent task.

**Supplementary Table 2. Food items of three diet quality scores within the Ovarian Cancer Follow-up Study**

| <b>Diet quality score</b>           | <b>Food items</b>                                                                                                                                                                                                                                                                |
|-------------------------------------|----------------------------------------------------------------------------------------------------------------------------------------------------------------------------------------------------------------------------------------------------------------------------------|
| <b>Chinese Healthy Eating Index</b> | <p>Adequate components: Total Grains, Whole Grains and Mixed Beans, Tubers, Total Vegetables, Dark Vegetables, Fruits, Dairy, Soybeans, Fish and Seafood, Poultry, Eggs, Seeds and Nuts.</p> <p>Limited components: Red Meat, Cooking Oils, Sodium, Added Sugars and Alcohol</p> |
| <b>Dietary Balance Index</b>        | <p>Cereal, Vegetable and Fruit, Dairy and Soybean, Animal Food (Red meat and products, Poultry and game, Fish and shrimp, Egg), Empty Energy Food (Alcoholic beverage), Condiments (Addible sugar), Diet Variety</p>                                                             |
| <b>Chinese Food Pagoda Score</b>    | <p>Grains, potatoes and beans, Vegetables, Fruits, Meat, Eggs, Dairy, Nuts and soyabean, Fish and shrimp</p>                                                                                                                                                                     |

**Supplementary Table 3. Baseline characteristics of ovarian cancer patients by tertiles of Chinese Healthy Eating Index and Chinese Food Pagoda Score (N=703).**

| Characteristics                           | Tertiles of the Chinese Healthy Eating Index |                     |                     | P value | Tertiles of the Chinese Food Pagoda Score |                     |                     | P value |
|-------------------------------------------|----------------------------------------------|---------------------|---------------------|---------|-------------------------------------------|---------------------|---------------------|---------|
|                                           | I                                            | II                  | III                 |         | I                                         | II                  | III                 |         |
| <b>Range</b>                              | 33.96-66.43                                  | 66.50-74.13         | 74.14-96.35         |         | <2.00                                     | 2.50-3.00           | >3.50               |         |
| <b>No. of patients/death</b>              | 234/51                                       | 234/45              | 235/34              |         | 230/41                                    | 226/45              | 247/44              |         |
| <b>Follow-up time (months)</b>            | 30.10 (19.53-44.10)                          | 30.92 (19.33-46.17) | 34.03 (22.50-48.70) | 0.20    | 31.55 (19.83-47.57)                       | 30.52 (18.00-45.50) | 32.50 (22.47-47.40) | 0.47    |
| <b>Age at diagnosis (years)</b>           | 53.42±9.94                                   | 53.00±9.12          | 54.46±9.24          | 0.22    | 52.81±9.91                                | 53.69±9.53          | 54.33±8.89          | 0.21    |
| <b>Body mass index (kg/m<sup>2</sup>)</b> | 23.58±3.50                                   | 23.19±3.78          | 22.97±3.46          | 0.18    | 23.62±3.94                                | 22.88±3.26          | 23.23±3.50          | 0.09    |
| <b>Total energy intake (kcal/d)</b>       | 1292.19±518.64                               | 1439.34±511.56      | 1634.97±573.20      | <0.05   | 1232.54±518.63                            | 1503.31±559.68      | 1620.09±508.81      | <0.05   |
| <b>Physical activity (MET/hours/d)</b>    | 16.78±12.24                                  | 16.22±10.81         | 14.25±10.51         | <0.05   | 16.53±11.93                               | 14.96±10.69         | 15.75±11.07         | 0.33    |
| <b>Menopausal status (n, %)</b>           |                                              |                     |                     | 0.74    |                                           |                     |                     | 0.64    |
| No                                        | 66 (28.21)                                   | 68 (29.06)          | 61 (25.96)          |         | 69 (30.00)                                | 61 (26.99)          | 65 (26.32)          |         |
| Yes                                       | 168 (71.79)                                  | 166 (70.94)         | 174 (74.04)         |         | 161 (70.00)                               | 165 (73.01)         | 182 (73.68)         |         |
| <b>Oral contraceptive use (n, %)</b>      |                                              |                     |                     | 0.19    |                                           |                     |                     | 0.36    |
| No                                        | 215 (91.88)                                  | 204 (87.18)         | 214 (91.06)         |         | 210 (91.30)                               | 206 (91.15)         | 217 (87.85)         |         |
| Yes                                       | 19 (8.12)                                    | 30 (12.82)          | 21 (8.94)           |         | 20 (8.70)                                 | 20 (8.85)           | 30 (12.15)          |         |
| <b>Parity (n, %)</b>                      |                                              |                     |                     | 0.76    |                                           |                     |                     | 0.34    |
| ≤1                                        | 164 (70.09)                                  | 171 (73.08)         | 170 (72.34)         |         | 159 (69.13)                               | 170 (75.22)         | 176 (71.26)         |         |
| ≥2                                        | 70 (29.91)                                   | 63 (26.92)          | 65 (27.66)          |         | 71 (30.87)                                | 56 (24.78)          | 71 (28.74)          |         |
| <b>Diet change (n, %)</b>                 |                                              |                     |                     | 0.23    |                                           |                     |                     | 0.85    |
| No                                        | 187 (79.91)                                  | 172 (73.50)         | 176 (74.89)         |         | 178 (77.39)                               | 170 (75.22)         | 187 (75.71)         |         |
| Yes                                       | 47 (20.09)                                   | 62 (26.50)          | 59 (25.11)          |         | 52 (22.61)                                | 56 (24.78)          | 60 (24.29)          |         |

|                                                 |             |             |             |       |             |             |             |      |
|-------------------------------------------------|-------------|-------------|-------------|-------|-------------|-------------|-------------|------|
| <b>Alcohol intake (n, %)</b>                    |             |             |             | 0.33  |             |             |             | 0.23 |
| No                                              | 178 (76.07) | 184 (78.63) | 192 (81.70) |       | 184 (80.00) | 184 (81.42) | 186 (75.30) |      |
| Yes                                             | 56 (23.93)  | 50 (21.37)  | 43 (18.30)  |       | 46 (20.00)  | 42 (18.58)  | 61 (24.70)  |      |
| <b>Tea drinking (n, %)</b>                      |             |             |             | 0.69  |             |             |             | 0.36 |
| No                                              | 159 (67.95) | 163 (69.66) | 155 (65.96) |       | 155 (67.39) | 161 (71.24) | 161 (65.18) |      |
| Yes                                             | 75 (32.05)  | 71 (30.34)  | 80 (34.04)  |       | 75 (32.61)  | 65 (28.76)  | 86 (34.82)  |      |
| <b>Smoking status (n, %)</b>                    |             |             |             | <0.05 |             |             |             | 0.68 |
| No                                              | 204 (87.18) | 210 (89.74) | 221 (94.04) |       | 205 (89.13) | 204 (90.27) | 226 (91.50) |      |
| Yes                                             | 30 (12.82)  | 24 (10.26)  | 14 (5.96)   |       | 25 (10.87)  | 22 (9.73)   | 21 (8.50)   |      |
| <b>Educational level (n, %)</b>                 |             |             |             | <0.05 |             |             |             | 0.76 |
| Junior secondary or below                       | 129 (55.13) | 123 (52.56) | 123 (52.34) |       | 124 (53.91) | 114 (50.44) | 137 (55.47) |      |
| Senior high school / technical secondary school | 57 (24.36)  | 35 (14.96)  | 55 (23.40)  |       | 50 (21.74)  | 51 (22.57)  | 46 (18.62)  |      |
| Junior college/university or above              | 48 (20.51)  | 76 (32.48)  | 57 (24.26)  |       | 56 (24.35)  | 61 (26.99)  | 64 (25.91)  |      |
| <b>Income per month (Yuan), (n, %)</b>          |             |             |             | <0.05 |             |             |             | 0.10 |
| <5000                                           | 149 (63.68) | 139 (59.40) | 133 (56.60) |       | 154 (66.96) | 126 (55.75) | 141 (57.09) |      |
| 5000 to <10000                                  | 62 (26.50)  | 53 (22.65)  | 79 (33.62)  |       | 51 (22.17)  | 67 (29.65)  | 76 (30.76)  |      |
| ≥10000                                          | 23 (9.82)   | 42 (17.95)  | 23 (9.78)   |       | 25 (10.87)  | 33 (14.60)  | 30 (12.15)  |      |

Abbreviation: MET, metabolic equivalent task.

Continuous variables are shown as mean  $\pm$  standard deviation.

P values were determined with one-way ANOVA, the Kruskal–Wallis test and chi-square test.

**Supplementary Table 4. Baseline characteristics of ovarian cancer patients by tertiles of Dietary Balance Index (N=703).**

| Characteristics                           | Tertiles of the High bound score |                     |                     | p value | Tertiles of the Low bound score |                     |                     | p value | Tertiles of the Diet quality distance |                     |                     | p value |
|-------------------------------------------|----------------------------------|---------------------|---------------------|---------|---------------------------------|---------------------|---------------------|---------|---------------------------------------|---------------------|---------------------|---------|
|                                           | I                                | II                  | III                 |         | I                               | II                  | III                 |         | I                                     | II                  | III                 |         |
| <b>Range</b>                              | 4.00-13.00                       | 14.00-15.00         | 16.00-24.00         |         | 3.00-11.00                      | 12.00-16.00         | 17.00-41.00         |         | 16.00-26.00                           | 27.00-31.00         | 32.00-53.00         |         |
| <b>No. of patients/ death</b>             | 222/42                           | 150/40              | 331/48              |         | 225/40                          | 229/38              | 249/52              |         | 213/40                                | 226/37              | 264/53              |         |
| <b>Follow-up time (months)</b>            | 31.74 (21.30-47.87)              | 30.70 (17.90-46.37) | 31.23 (20.10-46.87) | 0.82    | 31.70 (21.47-48.70)             | 32.70 (22.83-48.37) | 29.87 (18.43-42.17) | 0.08    | 32.73 (22.47-50.13)                   | 33.77 (22.50-46.80) | 28.39 (18.19-42.12) | <0.05   |
| <b>Age at diagnosis (years)</b>           | 53.29±9.34                       | 53.98±10.17         | 53.69±9.20          | 0.78    | 54.62±9.45                      | 52.85±8.76          | 53.45±10.00         | 0.13    | 54.96±9.52                            | 52.61±9.18          | 53.42±9.52          | <0.05   |
| <b>Body mass index (kg/m<sup>2</sup>)</b> | 23.29±3.81                       | 23.23±3.17          | 23.22±3.62          | 0.98    | 23.12±3.52                      | 23.08±3.54          | 23.51±3.68          | 0.34    | 23.19±3.29                            | 23.27±4.13          | 23.27±3.32          | 0.97    |
| <b>Total energy intake (kcal/d)</b>       | 1341.87±545.13                   | 1534.28±514.66      | 1496.55±563.82      | <0.05   | 1742.33±561.59                  | 1428.31±491.14      | 1222.05±477.34      | <0.05   | 1686.11±557.43                        | 1456.60±499.46      | 1269.18±522.88      | <0.05   |
| <b>Physical activity (MET/hours/d)</b>    | 16.60±11.81                      | 15.25±10.38         | 15.41±11.24         | 0.39    | 15.14±10.00                     | 15.65±11.51         | 16.40±12.05         | 0.47    | 15.14±10.23                           | 16.00±10.99         | 16.04±12.22         | 0.63    |
| <b>Menopausal status (n, %)</b>           |                                  |                     |                     | 0.47    |                                 |                     |                     | 0.77    |                                       |                     |                     | 0.16    |
| No                                        | 55 (24.77)                       | 45 (30.00)          | 95 (28.70)          |         | 59 (26.22)                      | 67 (29.26)          | 69 (27.71)          |         | 49 (23.00)                            | 70 (30.97)          | 76 (28.79)          |         |
| Yes                                       | 167 (75.23)                      | 105 (70.00)         | 236 (71.30)         |         | 166 (73.78)                     | 162 (70.74)         | 180 (72.29)         |         | 164 (77.00)                           | 156 (69.03)         | 188 (71.21)         |         |
| <b>Oral contraceptive use (n, %)</b>      |                                  |                     |                     | 0.66    |                                 |                     |                     | <0.05   |                                       |                     |                     | 0.73    |
| No                                        | 203 (91.44)                      | 133 (88.67)         | 297 (89.73)         |         | 204 (90.67)                     | 195 (85.15)         | 234 (93.98)         |         | 189 (88.73)                           | 204 (90.27)         | 240 (90.91)         |         |
| Yes                                       | 19 (8.56)                        | 17 (11.33)          | 34 (10.27)          |         | 21 (9.33)                       | 34 (14.85)          | 15 (6.02)           |         | 24 (11.27)                            | 22 (9.73)           | 24 (9.09)           |         |
| <b>Parity (n, %)</b>                      |                                  |                     |                     | 0.41    |                                 |                     |                     | 0.28    |                                       |                     |                     | 0.43    |
| ≤ 1                                       | 155 (69.82)                      | 114 (76.00)         | 236 (71.30)         |         | 170 (75.56)                     | 163 (71.18)         | 172 (69.08)         |         | 160 (75.12)                           | 158 (69.91)         | 187 (70.83)         |         |
| ≥ 2                                       | 67 (30.18)                       | 36 (24.00)          | 95 (28.70)          |         | 55 (24.44)                      | 66 (28.82)          | 77 (30.92)          |         | 53 (24.88)                            | 68 (30.09)          | 77 (29.17)          |         |
| <b>Diet change (n, %)</b>                 |                                  |                     |                     | 0.45    |                                 |                     |                     | 0.18    |                                       |                     |                     | 0.73    |
| No                                        | 166 (74.77)                      | 120 (80.00)         | 249 (75.23)         |         | 169 (75.11)                     | 167 (72.93)         | 199 (79.92)         |         | 159 (74.65)                           | 171 (75.66)         | 205 (77.65)         |         |

|                                                |             |             |             |      |             |             |             |      |             |             |             |      |
|------------------------------------------------|-------------|-------------|-------------|------|-------------|-------------|-------------|------|-------------|-------------|-------------|------|
| Yes                                            | 56 (25.23)  | 30 (20.00)  | 82 (24.77)  |      | 56 (24.89)  | 62 (27.07)  | 50 (20.08)  |      | 54 (25.35)  | 55 (24.34)  | 59 (22.35)  |      |
| <b>Alcohol intake (n, %)</b>                   |             |             |             | 0.45 |             |             |             | 0.19 |             |             |             | 0.74 |
| No                                             | 179 (80.63) | 121 (80.67) | 254 (76.74) |      | 169 (75.11) | 188 (82.10) | 197 (79.12) |      | 164 (77.00) | 180 (79.65) | 210 (79.55) |      |
| Yes                                            | 43 (19.37)  | 29 (19.33)  | 77 (23.26)  |      | 56 (24.89)  | 41 (17.90)  | 52 (20.88)  |      | 49 (23.00)  | 46 (20.35)  | 54 (20.45)  |      |
| <b>Tea drinking (n, %)</b>                     |             |             |             | 0.90 |             |             |             | 0.21 |             |             |             | 0.61 |
| No                                             | 153 (68.92) | 102 (68.00) | 222 (67.07) |      | 143 (63.56) | 157 (68.56) | 177 (71.08) |      | 145 (68.08) | 148 (65.49) | 184 (69.70) |      |
| Yes                                            | 69 (31.08)  | 48 (32.00)  | 109 (32.93) |      | 82 (36.44)  | 72 (31.44)  | 72 (28.92)  |      | 68 (31.92)  | 78 (34.51)  | 80 (30.30)  |      |
| <b>Smoking status (n, %)</b>                   |             |             |             | 0.12 |             |             |             | 0.28 |             |             |             | 0.37 |
| No                                             | 197 (88.74) | 142 (94.67) | 296 (89.43) |      | 207 (92.00) | 209 (91.27) | 219 (87.95) |      | 197 (92.49) | 204 (90.27) | 234 (88.64) |      |
| Yes                                            | 25 (11.26)  | 8 (5.33)    | 35 (10.57)  |      | 18 (8.00)   | 20 (8.73)   | 30 (12.05)  |      | 16 (7.51)   | 22 (9.73)   | 30 (11.36)  |      |
| <b>Educational level (n, %)</b>                |             |             |             | 0.08 |             |             |             | 0.59 |             |             |             | 0.44 |
| Junior secondary or below                      | 119 (53.60) | 94 (62.67)  | 162 (48.94) |      | 115 (51.11) | 120 (52.40) | 140 (56.22) |      | 114 (53.52) | 116 (51.33) | 145 (54.92) |      |
| Senior high school/ technical secondary school | 45 (20.27)  | 23 (15.33)  | 79 (23.87)  |      | 47 (20.89)  | 46 (20.09)  | 54 (21.69)  |      | 40 (18.78)  | 46 (20.35)  | 61 (23.11)  |      |
| Junior college/ university or above            | 58 (26.13)  | 33 (22.00)  | 90 (27.19)  |      | 63 (28.00)  | 63 (27.51)  | 55 (22.09)  |      | 59 (27.70)  | 64 (28.32)  | 58 (21.97)  |      |
| <b>Income per month (Yuan), (n, %)</b>         |             |             |             | 0.14 |             |             |             | 0.39 |             |             |             | 0.53 |
| < 5000                                         | 137 (61.71) | 100 (66.67) | 184 (55.59) |      | 123 (30.67) | 140 (61.14) | 158 (63.45) |      | 121 (56.81) | 132 (58.41) | 168 (63.64) |      |
| 5000 to < 10000                                | 61 (27.48)  | 36 (24.00)  | 97 (29.31)  |      | 69 (30.67)  | 62 (27.06)  | 63 (25.30)  |      | 66 (30.99)  | 63 (27.88)  | 65 (24.62)  |      |
| ≥ 10000                                        | 24 (10.81)  | 14 (9.33)   | 50 (15.10)  |      | 33 (14.66)  | 27 (11.80)  | 28 (11.25)  |      | 26 (12.20)  | 31 (13.71)  | 31 (11.74)  |      |

Abbreviation: MET, metabolic equivalent task.

Continuous variables are shown as mean  $\pm$  standard deviation.

P values were determined with one-way ANOVA, the Kruskal–Wallis test and chi-square test.

**Supplementary Table 5. Selected clinical characteristics and associations with overall survival among women diagnosed with ovarian cancer (N=703).**

| <b>Characteristic</b>           | <b>No. of deaths/total (%)</b> | <b>Adjusted HR <sup>a</sup> (95%CI)</b> |
|---------------------------------|--------------------------------|-----------------------------------------|
| <b>Age at diagnosis (years)</b> |                                |                                         |
| ≤50                             | 45/258 (17.44)                 | 1.00 (ref)                              |
| >50                             | 85/445 (19.10)                 | 1.24 (0.85, 1.79)                       |
| <b>Histological type</b>        |                                |                                         |
| Serous                          | 92/479 (19.21)                 | 1.00 (ref)                              |
| Non-serous                      | 38/224 (16.96)                 | 1.71 (1.11, 2.66)                       |
| <b>Histopathologic grade</b>    |                                |                                         |
| Well differentiated             | 5/56 (8.93)                    | 1.00 (ref)                              |
| Moderately differentiated       | 7/48 (14.58)                   | 1.12 (0.35, 3.57)                       |
| Poorly differentiated           | 118/599 (19.70)                | 1.76 (0.70, 4.43)                       |
| <b>FIGO stage</b>               |                                |                                         |
| I-II                            | 41/342 (11.99)                 | 1.00 (ref)                              |
| III-IV                          | 89/338 (26.33)                 | 2.54 (1.65, 3.91)                       |
| <b>Residual lesions</b>         |                                |                                         |
| No                              | 82/553 (14.83)                 | 1.00 (ref)                              |
| <1 cm                           | 31/106 (29.25)                 | 1.73 (1.11, 2.68)                       |
| ≥1 cm                           | 17/44 (38.64)                  | 2.41 (1.39, 4.16)                       |
| <b>Comorbidities</b>            |                                |                                         |
| No                              | 74/393 (18.83)                 | 1.00 (ref)                              |
| Yes                             | 56/310 (18.06)                 | 0.97 (0.68, 1.38)                       |

Abbreviation: CI, confidence interval; FIGO, The International Federation of Gynecology and Obstetrics; HR, hazard ratio; ref, reference.

<sup>a</sup> mutually adjusted for all other variables listed in the table.



**Supplementary Table 6. Relative excess risk due to interaction and 95% confidence interval (CI) for additive interaction between selected factors and Chinese Healthy Eating Index, Dietary Balance Index, Chinese Food Pagoda Score.**

| Selected factors                          | Relative excess risk due to interaction (95% CI) * |                        |                        |                        |                        |
|-------------------------------------------|----------------------------------------------------|------------------------|------------------------|------------------------|------------------------|
|                                           | Higher CHEI<br>(≥70.23)                            | Dietary Balance Index  |                        |                        | Higher CFPS<br>(≥3.00) |
|                                           |                                                    | Higher HBS<br>(≥15.00) | Higher LBS<br>(≥14.00) | Higher DQD<br>(≥30.00) |                        |
| <b>Age at diagnosis (years)</b>           | 0.40 (-0.04, 0.85)                                 | -0.12 (-0.82, 0.58)    | -0.19 (-1.10, 0.73)    | 0.01 (-0.74, 0.76)     | 0.27 (-0.31, 0.85)     |
| <b>Menopausal status</b>                  | 0.59 (0.29, 0.90)                                  | -0.03 (-0.69, 0.63)    | -0.60 (-1.75, 0.55)    | -0.60 (-1.71, 0.50)    | 0.14 (-0.45, 0.72)     |
| <b>Body mass index (kg/m<sup>2</sup>)</b> | -0.64 (-1.50, 0.21)                                | 0.03 (-0.65, 0.71)     | 0.26 (-0.53, 1.06)     | 0.66 (0.01, 1.32)      | -0.15 (-0.96, 0.65)    |
| <b>Histological type</b>                  | -0.21 (-0.91, 0.49)                                | -0.09 (-0.80, 0.62)    | 0.57 (-0.16, 1.30)     | 0.36 (-0.36, 1.09)     | -0.40 (-1.23, 0.43)    |
| <b>FIGO stage</b>                         | -0.62 (-1.86, 0.62)                                | 0.25 (-0.65, 1.16)     | -0.90 (-2.96, 1.17)    | -0.05 (-1.58, 1.49)    | 0.34 (-0.66, 1.34)     |
| <b>Residual lesions</b>                   | 0.31 (-0.84, 1.46)                                 | 0.22 (-0.95, 1.40)     | -0.48 (-2.31, 1.36)    | -0.05 (-1.68, 1.59)    | 0.63 (-0.62, 1.89)     |

Abbreviation: CHEI, Chinese Healthy Eating Index; CFPS, Chinese Food Pagoda Score; CI, confidence interval; DQD, diet quality distance; HBS, high bound score; HR, hazard ratio; LBS, low bound score.

\* Test for interaction based on strata and Chinese Healthy Eating Index, Dietary Balance Index, Chinese Food Pagoda Score.

**Supplementary Table 7. Hazard ratio (95% CI) for overall survival of ovarian cancer after excluding patients who died within the first year of enrollment according to Chinese Healthy Eating Index, Dietary Balance Index, and Chinese Food Pagoda Score (N=663).**

| Characteristics                     | Tertile distribution |                   |                   | P for trend <sup>c</sup> | Continuous <sup>d</sup> |
|-------------------------------------|----------------------|-------------------|-------------------|--------------------------|-------------------------|
|                                     | I                    | II                | III               |                          |                         |
| <b>Chinese Healthy Eating Index</b> |                      |                   |                   |                          |                         |
| Deaths, N (% of total deaths)       | 36 (40.00)           | 33 (36.67)        | 21 (23.33)        |                          |                         |
| Model 1 HR (95%CI)                  | 1.00 (ref)           | 0.86 (0.53, 1.39) | 0.45 (0.26, 0.79) | < 0.05                   | 0.80 (0.65, 0.97)       |
| Model 2 HR (95%CI)                  | 1.00 (ref)           | 0.92 (0.57, 1.49) | 0.45 (0.26, 0.79) | < 0.05                   | 0.80 (0.65, 0.98)       |
| <b>Dietary Balance Index</b>        |                      |                   |                   |                          |                         |
| <b>Diet quality distance</b>        |                      |                   |                   |                          |                         |
| Deaths, N (% of total deaths)       | 23 (25.56)           | 30 (33.33)        | 37 (41.11)        |                          |                         |
| Model 1 HR (95%CI)                  | 1.00 (ref)           | 1.36 (0.78, 2.39) | 1.72 (1.00, 2.96) | 0.05                     | 1.10 (0.89, 1.35)       |
| Model 2 HR (95%CI)                  | 1.00 (ref)           | 1.35 (0.77, 2.37) | 1.67 (0.97, 2.88) | 0.06                     | 1.09 (0.89, 1.35)       |
| <b>High bound score</b>             |                      |                   |                   |                          |                         |
| Deaths, N (% of total deaths)       | 30 (33.33)           | 26 (28.89)        | 34 (37.78)        |                          |                         |
| Model 1 HR (95%CI)                  | 1.00 (ref)           | 1.24 (0.73, 2.11) | 0.72 (0.44, 1.18) | 0.15                     | 0.91 (0.74, 1.12)       |
| Model 2 HR (95%CI)                  | 1.00 (ref)           | 1.23 (0.72, 2.10) | 0.74 (0.45, 1.22) | 0.19                     | 0.91 (0.74, 1.12)       |
| <b>Low bound score</b>              |                      |                   |                   |                          |                         |
| Deaths, N (% of total deaths)       | 28 (31.11)           | 27 (30.00)        | 35 (38.89)        |                          |                         |
| Model 1 HR (95%CI)                  | 1.00 (ref)           | 0.98 (0.57, 1.69) | 1.49 (0.87, 2.56) | 0.13                     | 1.17 (0.94, 1.45)       |
| Model 2 HR (95%CI)                  | 1.00 (ref)           | 0.97 (0.56, 1.68) | 1.46 (0.85, 2.51) | 0.15                     | 1.16 (0.93, 1.44)       |
| <b>Chinese Food Pagoda Score</b>    |                      |                   |                   |                          |                         |
| Deaths, N (% of total deaths)       | 30 (33.33)           | 29 (32.22)        | 31 (34.44)        |                          |                         |
| Model 1 HR (95%CI)                  | 1.00 (ref)           | 0.88 (0.52, 1.49) | 0.83 (0.49, 1.40) | 0.48                     | 0.90 (0.72, 1.11)       |
| Model 2 HR (95%CI)                  | 1.00 (ref)           | 0.89 (0.52, 1.52) | 0.80 (0.47, 1.36) | 0.42                     | 0.89 (0.71, 1.11)       |

Abbreviation: ref, reference; CI, confidence interval; FIGO, The International Federation of Gynecology and Obstetrics; HR, hazard ratio.

Hazard ratios and 95% confidence intervals were calculated with the use of the Cox proportional hazards regression model.

<sup>a</sup> Model 1 was adjusted for age at diagnosis, total energy intake, and body mass index.

<sup>b</sup> Model 2 was adjusted for age at diagnosis, total energy intake, body mass index, physical activity, income, educational level, and comorbidities.

<sup>c</sup> P-value for linear trend calculated from category median values.

<sup>d</sup> Continuous intakes were calculated by 1 standard deviation increments of diet quality score. Standard deviation: Chinese Healthy Eating Index, 9.27; High bound score, 2.76; Low bound score, 5.97; Diet quality distance, 5.90; Chinese Food Pagoda Score, 1.11.

**Supplementary Table 8. Hazard ratio (95% CI) for overall survival among ovarian cancer patients after excluding patients with diet change according to Chinese Healthy Eating Index, Dietary Balance Index, and Chinese Food Pagoda Score (N=535).**

| Characteristics                     | Tertile distribution |                   |                   | P for trend <sup>c</sup> | Continuous <sup>d</sup> |
|-------------------------------------|----------------------|-------------------|-------------------|--------------------------|-------------------------|
|                                     | I                    | II                | III               |                          |                         |
| <b>Chinese Healthy Eating Index</b> |                      |                   |                   |                          |                         |
| Deaths, N (% of total deaths)       | 41 (41.84)           | 32 (32.65)        | 25 (25.51)        |                          |                         |
| Model 1 HR (95%CI)                  | 1.00 (ref)           | 0.75 (0.47, 1.20) | 0.51 (0.31, 0.86) | < 0.05                   | 0.83 (0.68, 1.01)       |
| Model 2 HR (95%CI)                  | 1.00 (ref)           | 0.84 (0.52, 1.34) | 0.53 (0.32, 0.89) | < 0.05                   | 0.86 (0.70, 1.04)       |
| <b>Dietary Balance Index</b>        |                      |                   |                   |                          |                         |
| <b>Diet quality distance</b>        |                      |                   |                   |                          |                         |
| Deaths, N (% of total deaths)       | 27 (27.55)           | 28 (28.57)        | 43 (43.88)        |                          |                         |
| Model 1 HR (95%CI)                  | 1.00 (ref)           | 1.01 (0.59, 1.73) | 1.46 (0.88, 2.41) | 0.12                     | 1.09 (0.90, 1.34)       |
| Model 2 HR (95%CI)                  | 1.00 (ref)           | 1.01 (0.59, 1.73) | 1.39 (0.84, 2.30) | 0.17                     | 1.07 (0.87, 1.31)       |
| <b>High bound score</b>             |                      |                   |                   |                          |                         |
| Deaths, N (% of total deaths)       | 30 (30.61)           | 34 (34.69)        | 34 (34.69)        |                          |                         |
| Model 1 HR (95%CI)                  | 1.00 (ref)           | 1.52 (0.92, 2.50) | 0.70 (0.43, 1.15) | 0.10                     | 0.87 (0.71, 1.07)       |
| Model 2 HR (95%CI)                  | 1.00 (ref)           | 1.43 (0.87, 2.37) | 0.67 (0.41, 1.11) | 0.08                     | 0.85 (0.69, 1.05)       |
| <b>Low bound score</b>              |                      |                   |                   |                          |                         |
| Deaths, N (% of total deaths)       | 27 (27.55)           | 29 (29.59)        | 42 (42.86)        |                          |                         |
| Model 1 HR (95%CI)                  | 1.00 (ref)           | 1.16 (0.68, 1.99) | 1.65 (0.97, 2.79) | 0.05                     | 1.18 (0.96, 1.45)       |
| Model 2 HR (95%CI)                  | 1.00 (ref)           | 1.13 (0.66, 1.93) | 1.58 (0.94, 2.68) | 0.07                     | 1.15 (0.94, 1.41)       |
| <b>Chinese Food Pagoda Score</b>    |                      |                   |                   |                          |                         |
| Deaths, N (% of total deaths)       | 31 (31.63)           | 37 (37.76)        | 30 (30.61)        |                          |                         |
| Model 1 HR (95%CI)                  | 1.00 (ref)           | 1.18 (0.72, 1.94) | 0.84 (0.50, 1.42) | 0.58                     | 0.93 (0.75, 1.14)       |
| Model 2 HR (95%CI)                  | 1.00 (ref)           | 1.20 (0.73, 1.99) | 0.83 (0.49, 1.41) | 0.55                     | 0.93 (0.75, 1.14)       |

Abbreviation: ref, reference; CI, confidence interval; FIGO, The International Federation of Gynecology and Obstetrics; HR, hazard ratio.

Hazard ratios and 95% confidence intervals were calculated with the use of the Cox proportional hazards regression model.

<sup>a</sup> Model 1 was adjusted for age at diagnosis, total energy intake, and body mass index.

<sup>b</sup> Model 2 was adjusted for age at diagnosis, total energy intake, body mass index, physical activity, income, educational level, and comorbidities.

<sup>c</sup> P-value for linear trend calculated from category median values.

<sup>d</sup> Continuous intakes were calculated by 1 standard deviation increments of diet quality score. Standard deviation: Chinese Healthy Eating Index, 9.21; High bound score, 2.75; Low bound score, 6.01; Diet quality distance, 5.87; Chinese Food Pagoda Score, 1.11.

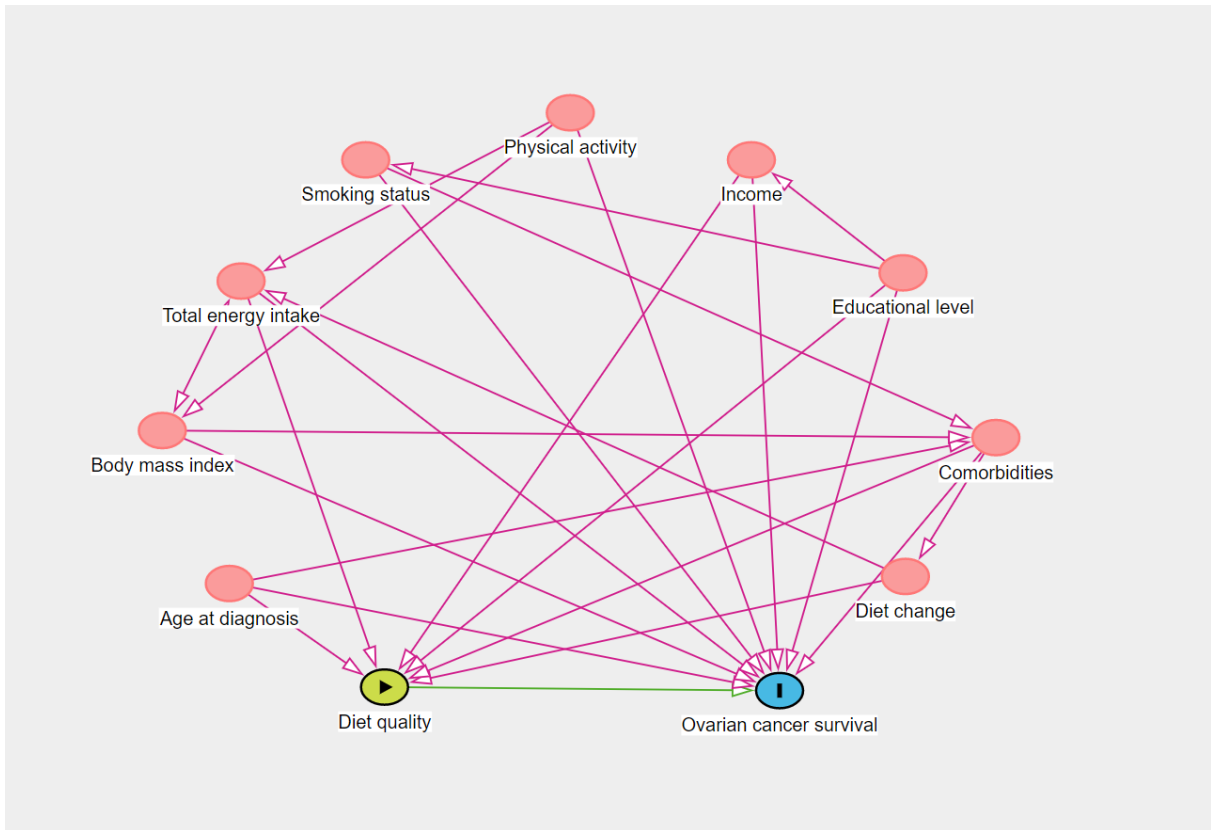

**Supplementary Fig 1. Directed acyclic graph (DAG) visualizing potential confounders of the association between diet quality and ovarian cancer survival.**

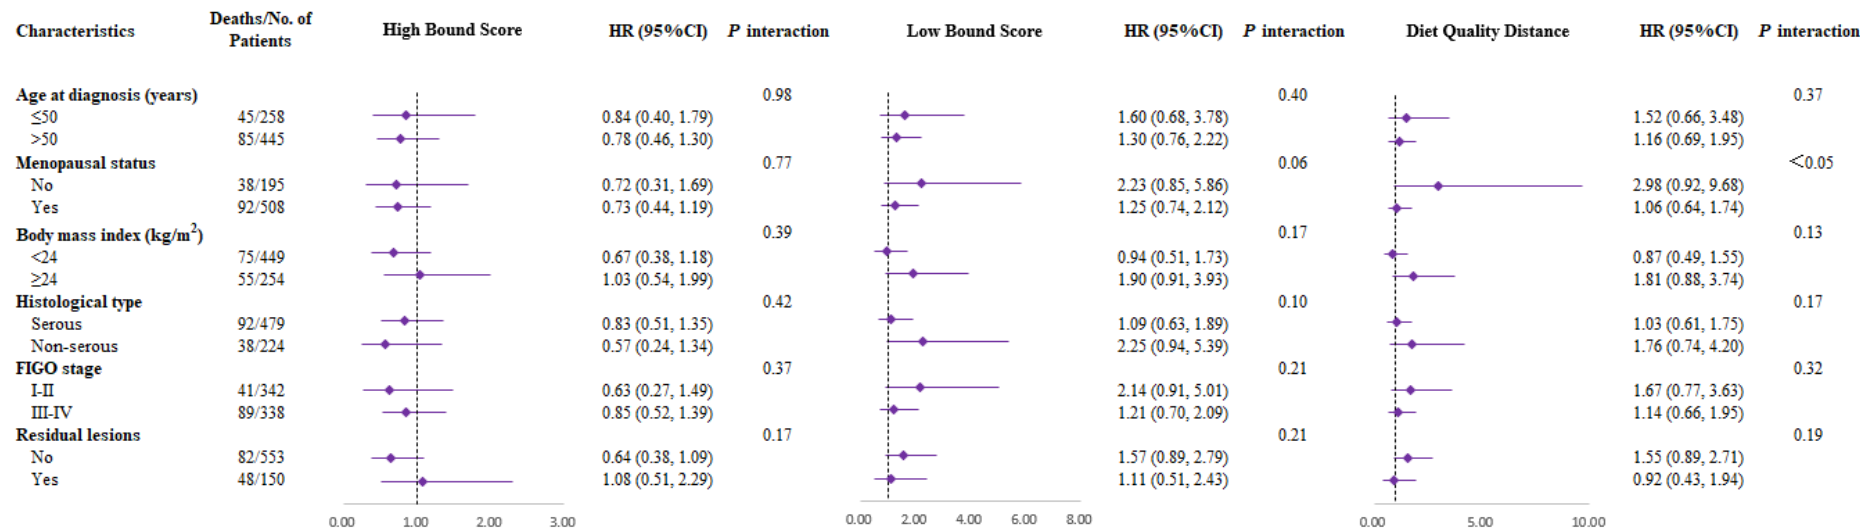

**Supplementary Fig 2. Multivariable hazard ratios (HRs) and 95% CIs for overall survival among patients with ovarian cancer according to Dietary Balance Index across strata of various factors.**

Abbreviation: CI, confidence interval.

The forest plot represents the HRs of the comparison of the highest versus the lowest of Dietary Balance Index. Cox model stratified by clinical and reproductive factors, adjusted for age at diagnosis, total energy intake, body mass index, physical activity, income, educational level, comorbidities (excluding stratification factors).

P for interaction between strata and Dietary Balance Index.

P values are two-sided.

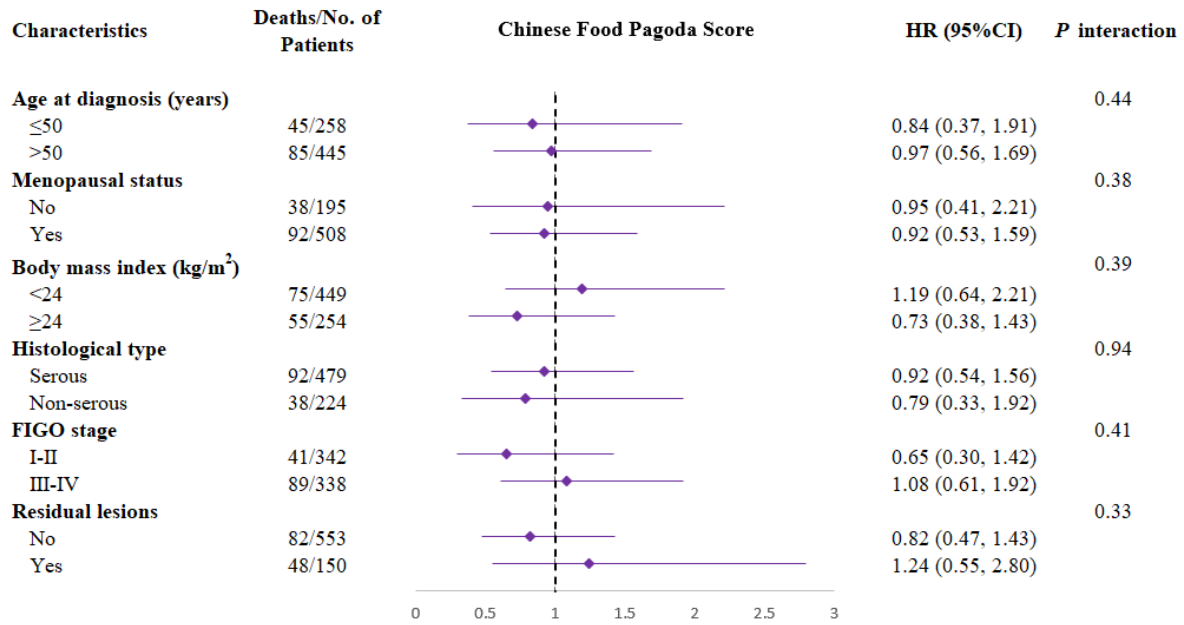

**Supplementary Fig 3. Multivariable hazard ratios (HRs) and 95% CIs for overall survival among patients with ovarian cancer according to Chinese Food Pagoda Score across strata of various factors.**

Abbreviation: CI, confidence interval.

The forest plot represents the HRs of the comparison of the highest versus the lowest of Chinese Food Pagoda Score. Cox model stratified by clinical and reproductive factors, adjusted for age at diagnosis, total energy intake, body mass index, physical activity, income, educational level, comorbidities (excluding stratification factors).

P for interaction between strata and Chinese Food Pagoda Score.

P values are two-sided.



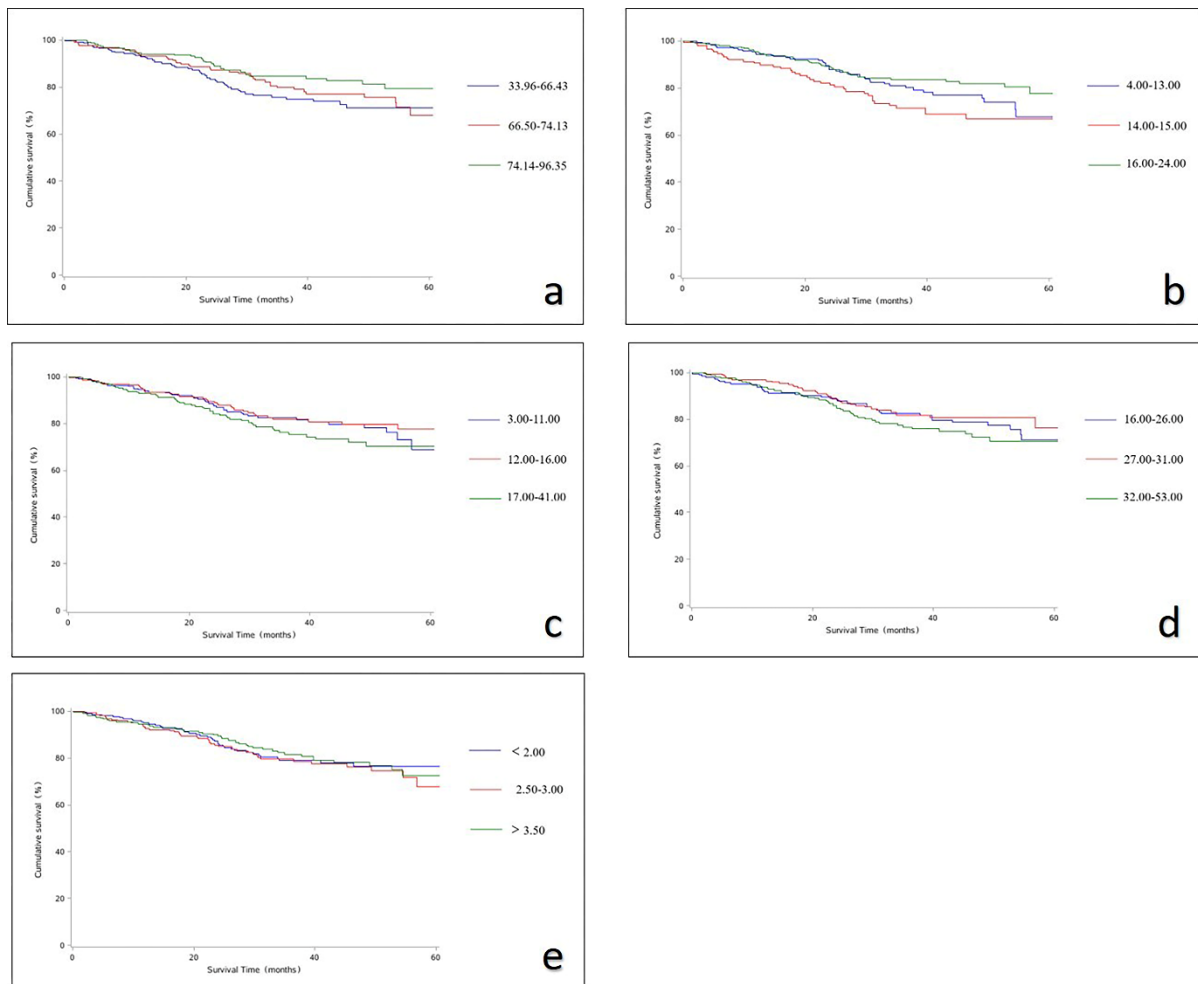

**Supplementary Fig 4. Kaplan–Meier survival curves for Chinese Healthy Eating Index, Dietary Balance Index, and Chinese Food Pagoda Score.**

a: Chinese Healthy Eating Index; b: High bound score in Dietary Balance Index; c: Low bound score in Dietary Balance Index; d: Diet quality distance in Dietary Balance Index; e: Chinese Food Pagoda Score. Each index is divided into three groups.
